# Supplementary material for: Fibrotic Burden Determines Cardiovascular Risk among Subjects with Metabolic Dysfunction-Associated Fatty Liver Disease
Source: PubMed Central journal article supplement — Gut Liver. 2022 Mar 24;16(5):786–97. doi: 10.5009/gnl210290 (PMC9474484; doi:10.5009/gnl210290), 2022-03-24
Supplement: gnl-16-5-786-supple.pdf [file gnl-16-5-786-supple.pdf]

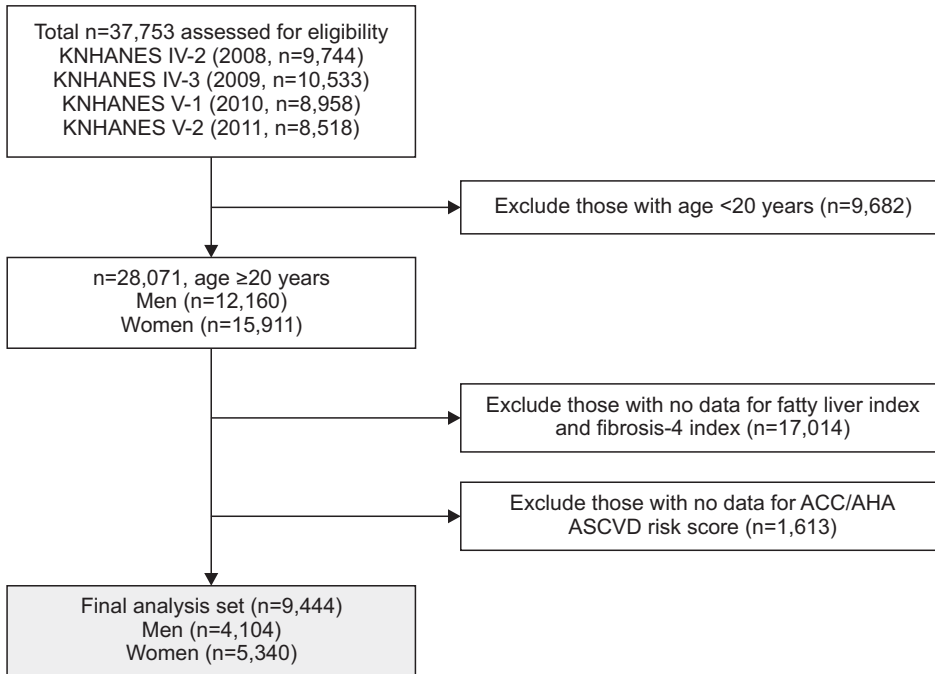

**Supplementary Fig. 1.** Flow diagram of subject inclusion and exclusion in the Korea National Health and Nutrition Examination Surveys (KNHANES IV and V). Of 37,753 subjects, 9,444 were finally included (4,104 men and 5,340 women). ASCVD, atherosclerotic cardiovascular disease; ACC/AHA, American College of Cardiology/American Heart Association.

**Supplementary Table 1.** 10-Year Atherosclerotic Cardiovascular Disease Risk Estimation

|                              | Male        |                          |                    | Female      |                          |                    |
|------------------------------|-------------|--------------------------|--------------------|-------------|--------------------------|--------------------|
|                              | Coefficient | Individual example value | Coefficient ×value | Coefficient | Individual example value | Coefficient ×value |
| Log age, yr                  | 12.344      | 4.01                     | 49.47              | -29.799     | 4.01                     | -119.41            |
| Log age, squared             |             |                          |                    | 4.884       | 16.06                    | 78.44              |
| Log TC, mg/dL                | 11.853      | 5.36                     | 63.55              | 13.540      | 5.36                     | 72.59              |
| Log age×log TC               | -2.664      | 21.48                    | -57.24             | -3.114      | 21.48                    | -66.91             |
| Log HDL-C, mg/dL             | -7.990      | 3.91                     | -31.26             | -13.578     | 3.91                     | -53.12             |
| Log age×log HDL-C            | 1.769       | 15.68                    | 27.73              | 3.149       | 15.68                    | 49.37              |
| Log treated SBP, mm Hg       | 1.97        | -                        | -                  | 2.019       | -                        | -                  |
| Log age×log treated SBP      |             |                          |                    | NA          | NA                       | NA                 |
| Log untreated SBP, mm Hg     | 1.764       | 4.79                     | 8.45               | 1.957       | 4.79                     | 9.37               |
| Log age×log untreated SBP    |             |                          |                    | NA          | NA                       | NA                 |
| Current smoker (1=yes, 0=no) | 7.837       | 0                        | 0                  | 7.574       | 0                        | 0                  |
| Log age×current smoker       | -1.795      | 0                        | 0                  | -1.665      | 0                        | 0                  |
| Diabetes (1=yes, 0=no)       | 0.658       | 0                        | 0                  | 0.661       | 0                        | 0                  |
| Individual sum               |             |                          | 60.69              |             |                          | -29.67             |
| Mean (coefficient×value)     | NA          | NA                       | 61.18              | NA          | NA                       | -29.18             |
| Baseline survival            | NA          | NA                       | 0.9144             | NA          | NA                       | 0.9665             |

TC, total cholesterol; HDL-C, high density lipoprotein cholesterol; SBP, systolic blood pressure; NA, not available.

Supplementary Table 2. Baseline Characteristics

| Variable                                                         | Subjects without MAFLD (n=5,852, 62.0%) | Subjects with MAFLD (n=3,592, 38.0%)                  |                                                 | p-value |
|------------------------------------------------------------------|-----------------------------------------|-------------------------------------------------------|-------------------------------------------------|---------|
|                                                                  |                                         | No significant liver fibrosis by NFS (n=2,772, 29.4%) | Significant liver fibrosis by NFS (n=820, 8.7%) |         |
| <b>Demographic variables</b>                                     |                                         |                                                       |                                                 |         |
| Age, yr                                                          | 46.6±15.6                               | 49.2±13.7 <sup>#</sup>                                | 64.5±9.9 <sup>#,**</sup>                        | <0.001  |
| Male gender                                                      | 1,984 (33.9)                            | 1,649 (59.5) <sup>#</sup>                             | 471 (57.4) <sup>#</sup>                         | <0.001  |
| Waist circumference, cm                                          | 75.9±7.3                                | 89.0±7.1 <sup>#</sup>                                 | 91.5±7.2 <sup>#</sup>                           | <0.001  |
| Body mass index, kg/m <sup>2</sup>                               | 22.0±2.4                                | 26.1±2.7 <sup>#</sup>                                 | 26.5±3.1 <sup>#,**</sup>                        | <0.001  |
| Appendicular skeletal muscle mass, kg                            | 17.4±4.3                                | 21.3±5.2                                              | 20.1±4.7                                        | <0.001  |
| Sarcopenia*                                                      | 797 (13.6)                              | 740 (26.7) <sup>#</sup>                               | 358 (42.7) <sup>#,**</sup>                      | <0.001  |
| ASCVD risk score <sup>†</sup>                                    | 5.3±9.6                                 | 7.2±8.7 <sup>#</sup>                                  | 19.3±14.7 <sup>#,**</sup>                       | <0.001  |
| Systolic blood pressure, mm Hg                                   | 114.9±17.0                              | 122.6±16.3 <sup>#</sup>                               | 130.7±17.0 <sup>#,**</sup>                      | <0.001  |
| Diastolic blood pressure, mm Hg                                  | 73.5±10.2                               | 79.9±11.1 <sup>#</sup>                                | 79.5±10.0 <sup>#</sup>                          | <0.001  |
| Hypertension                                                     | 1,473 (25.2)                            | 1,045 (37.7) <sup>#</sup>                             | 516 (62.9) <sup>#,**</sup>                      | <0.001  |
| Metabolic syndrome                                               | 677 (11.6)                              | 1,525 (55.0) <sup>#</sup>                             | 672 (82.1) <sup>#,**</sup>                      | <0.001  |
| Diabetes                                                         | 327 (5.6)                               | 321 (11.6) <sup>#</sup>                               | 270 (32.9) <sup>#,**</sup>                      | <0.001  |
| Current smoker                                                   | 962 (16.4)                              | 842 (30.4) <sup>#</sup>                               | 148 (18.0) <sup>**</sup>                        | <0.001  |
| Central obesity <sup>‡</sup>                                     | 1,016 (17.4)                            | 1,722 (62.1) <sup>#</sup>                             | 604 (73.7) <sup>#,**</sup>                      | <0.001  |
| Overweight <sup>§</sup>                                          | 1,922 (32.8)                            | 2,507 (90.4) <sup>#</sup>                             | 741 (90.4) <sup>#</sup>                         | <0.001  |
| Exercise                                                         | 886 (15.1)                              | 502 (18.1) <sup>#</sup>                               | 133 (16.2)                                      | 0.013   |
| Heavy alcohol drink <sup>  </sup>                                | 705 (12.0)                              | 642 (23.2) <sup>#</sup>                               | 168 (20.5) <sup>#</sup>                         | <0.001  |
| <b>Laboratory variables</b>                                      |                                         |                                                       |                                                 |         |
| Fasting blood glucose, mg/dL                                     | 93.2±17.2                               | 101.3±23.1 <sup>#</sup>                               | 115.7±31.3 <sup>#,**</sup>                      | <0.001  |
| Insulin, μIU/mL <sup>¶</sup>                                     | 8.9±3.6                                 | 11.4±5.0 <sup>#</sup>                                 | 12.4±6.4 <sup>#,**</sup>                        | <0.001  |
| Homeostatic model assessment of insulin resistance <sup>¶</sup>  | 2.1±1.0                                 | 2.9±1.6 <sup>#</sup>                                  | 3.6±2.2 <sup>#</sup>                            | <0.001  |
| Total cholesterol, mg/dL                                         | 181.3±33.2                              | 201.6±37.2 <sup>#</sup>                               | 193.2±38.1 <sup>#</sup>                         | <0.001  |
| Triglyceride, mg/dL <sup>¶</sup>                                 | 92.7±47.0                               | 200.3±137.3 <sup>#</sup>                              | 197.1±154.1 <sup>#</sup>                        | <0.001  |
| High density lipoprotein cholesterol, mg/dL <sup>¶</sup>         | 55.7±12.6                               | 47.3±10.6 <sup>#</sup>                                | 46.7±11.6 <sup>#</sup>                          | <0.001  |
| Low density lipoprotein cholesterol, mg/dL <sup>¶</sup>          | 111.1±30.0                              | 122.0±34.3 <sup>#</sup>                               | 115.0±33.7 <sup>**</sup>                        | <0.001  |
| Serum creatinine, mg/dL                                          | 0.8±0.2                                 | 0.9±0.2 <sup>#</sup>                                  | 0.9±0.2 <sup>#,**</sup>                         | <0.001  |
| Estimated glomerular filtration rate, mL/min/1.73 m <sup>2</sup> | 96.9±17.5                               | 92.4±16.2 <sup>#</sup>                                | 80.2±16.7 <sup>#,**</sup>                       | <0.001  |
| Aspartate aminotransferase, IU/L <sup>¶</sup>                    | 20.0±8.5                                | 25.3±16.1 <sup>#</sup>                                | 29.8±25.7 <sup>#,**</sup>                       | <0.001  |
| Alanine aminotransferase, IU/L <sup>¶</sup>                      | 16.8±10.0                               | 30.1±26.1 <sup>#</sup>                                | 25.9±17.7 <sup>#</sup>                          | <0.001  |
| Platelet count, 10 <sup>9</sup> /L <sup>¶</sup>                  | 254.2±57.6                              | 271.0±54.4                                            | 212.7±45.5 <sup>#,**</sup>                      | <0.001  |
| Gamma glutamyl-transpeptidase, IU/L <sup>¶</sup>                 | 21.5±30.0                               | 55.2±59.9 <sup>#</sup>                                | 60.8±83.4 <sup>#</sup>                          | <0.001  |
| <b>Liver fibrosis and steatosis</b>                              |                                         |                                                       |                                                 |         |
| NAFLD fibrosis score                                             | 0.3±1.2                                 | 0.5±1.0 <sup>#</sup>                                  | 2.7±0.7 <sup>#,**</sup>                         | <0.001  |
| Fibrosis-4 index                                                 | 1.0±0.7                                 | 0.9±0.4 <sup>#</sup>                                  | 2.0±1.5 <sup>#,**</sup>                         | <0.001  |
| Fatty liver index                                                | 12.4±9.0                                | 55.3±17.8 <sup>#</sup>                                | 57.7±18.5 <sup>#,**</sup>                       | <0.001  |

Data are presented as mean±SD or number (%).

MAFLD, metabolic dysfunction-associated fatty liver disease; NFS, nonalcoholic fatty liver disease fibrosis score; ASCVD, atherosclerotic cardiovascular disease; NAFLD, nonalcoholic fatty liver disease.

\*Sarcopenia was defined as the lowest quintile for sex-specific sarcopenia index; <sup>†</sup>ASCVD risk score was calculated using the 10-year ASCVD risk score from the 2013 American College of Cardiology/American Heart Association guideline; <sup>‡</sup>Central obesity was defined waist circumference ≥90 cm in men, ≥80 cm in women; <sup>§</sup>Overweight was defined body mass index ≥23 kg/m<sup>2</sup>; <sup>||</sup>Heavy drink was defined as those whose alcohol consumption exceeded 140 g/week for men and 70 g/week for women; <sup>¶</sup>Log-transformed; <sup>#</sup>p<0.05 by *post hoc* analyses when compared without MAFLD; <sup>\*\*</sup>p<0.05 by *post hoc* analyses when compared with MAFLD, without significant liver fibrosis.

**Supplementary Table 3.** Baseline Characteristics in Propensity Score Matching

| Variable                                                         | Subjects without MAFLD (n=549, 33.3%) | Subjects with MAFLD (n=1,098, 38.0%)                  |                                                    | p-value |
|------------------------------------------------------------------|---------------------------------------|-------------------------------------------------------|----------------------------------------------------|---------|
|                                                                  |                                       | No significant liver fibrosis by FIB-4 (n=549, 33.3%) | Significant liver fibrosis by FIB-4 (n=549, 33.3%) |         |
| <b>Demographic variables</b>                                     |                                       |                                                       |                                                    |         |
| Age, yr                                                          | 60.2±8.0                              | 60.2±8.0                                              | 60.2±8.0                                           | >0.999  |
| Male gender                                                      | 307 (55.9)                            | 307 (55.9)                                            | 307 (55.9)                                         | >0.999  |
| Waist circumference, cm                                          | 77.2±6.8                              | 90.0±7.1 <sup>#</sup>                                 | 89.7±7.3 <sup>#</sup>                              | <0.001  |
| Body mass index, kg/m <sup>2</sup>                               | 21.8±2.2                              | 25.9±2.4 <sup>#</sup>                                 | 25.9±2.8 <sup>#</sup>                              | <0.001  |
| Appendicular skeletal muscle mass, kg                            | 18.4±4.6                              | 19.9±4.8 <sup>#</sup>                                 | 20.1±4.6 <sup>#,**</sup>                           | <0.001  |
| Sarcopenia*                                                      | 84 (15.3)                             | 216 (39.3) <sup>#</sup>                               | 184 (33.5) <sup>#</sup>                            | <0.001  |
| ASCVD risk score <sup>†</sup>                                    | 5.9±4.2                               | 10.7±9.7 <sup>#</sup>                                 | 13.7±11.0 <sup>#,**</sup>                          | <0.001  |
| Systolic blood pressure, mm Hg                                   | 112.5±12.8                            | 123.4±15.8 <sup>#</sup>                               | 130.3±17.6 <sup>#,**</sup>                         | <0.001  |
| Diastolic blood pressure, mm Hg                                  | 72.1±9.3                              | 77.6±9.8 <sup>#</sup>                                 | 81.0±10.5 <sup>#,**</sup>                          | <0.001  |
| Hypertension                                                     | 88 (16.0)                             | 283 (51.5) <sup>#</sup>                               | 395 (71.9) <sup>#,**</sup>                         | <0.001  |
| Metabolic syndrome                                               | 27 (4.9)                              | 324 (59.0) <sup>#</sup>                               | 403 (73.4) <sup>#,**</sup>                         | <0.001  |
| Diabetes                                                         | 11 (2.0)                              | 66 (12.0) <sup>#</sup>                                | 143 (26.0) <sup>#,**</sup>                         | <0.001  |
| Current smoker                                                   | 51 (9.3)                              | 73 (13.3) <sup>#</sup>                                | 130 (23.7) <sup>**</sup>                           | <0.001  |
| Central obesity <sup>‡</sup>                                     | 65 (11.8)                             | 386 (70.3) <sup>#</sup>                               | 361 (65.8) <sup>#</sup>                            | <0.001  |
| Overweight <sup>§</sup>                                          | 144 (26.2)                            | 494 (90.0) <sup>#</sup>                               | 473 (86.2) <sup>#</sup>                            | <0.001  |
| Exercise                                                         | 92 (16.8)                             | 99 (18.0)                                             | 109 (19.9)                                         | 0.184   |
| Heavy alcohol drink <sup>  </sup>                                | 64 (11.7)                             | 90 (16.4) <sup>#</sup>                                | 136 (24.8) <sup>#</sup>                            | <0.001  |
| <b>Laboratory variables</b>                                      |                                       |                                                       |                                                    |         |
| Fasting blood glucose, mg/dL                                     | 92.7±9.9                              | 103.5±22.6 <sup>#</sup>                               | 109.0±26.6 <sup>#,**</sup>                         | <0.001  |
| Insulin, μIU/mL <sup>¶</sup>                                     | 7.9±2.7                               | 11.0±5.1 <sup>#</sup>                                 | 11.5±4.9 <sup>#,**</sup>                           | <0.001  |
| Homeostatic model assessment of insulin resistance <sup>¶</sup>  | 1.8±0.7                               | 2.9±1.7 <sup>#</sup>                                  | 3.1±1.7 <sup>#</sup>                               | <0.001  |
| Total cholesterol, mg/dL                                         | 180.7±32.3                            | 201.2±36.0 <sup>#</sup>                               | 196.0±39.8 <sup>#</sup>                            | <0.001  |
| Triglyceride, mg/dL <sup>¶</sup>                                 | 93.0±52.4                             | 173.0±90.9 <sup>#</sup>                               | 224.6±214.9 <sup>#</sup>                           | <0.001  |
| High density lipoprotein cholesterol, mg/dL <sup>¶</sup>         | 57.2±13.4                             | 49.0±10.8 <sup>#</sup>                                | 46.8±10.5 <sup>#,**</sup>                          | <0.001  |
| Low density lipoprotein cholesterol, mg/dL <sup>¶</sup>          | 109.1±28.8                            | 120.5±35.0                                            | 114.3±32.3 <sup>**</sup>                           | <0.001  |
| Serum creatinine, mg/dL                                          | 0.8±0.2                               | 0.9±0.2 <sup>#</sup>                                  | 0.9±0.2 <sup>#,**</sup>                            | 0.038   |
| Estimated glomerular filtration rate, mL/min/1.73 m <sup>2</sup> | 87.2±12.1                             | 85.1±13.9 <sup>#</sup>                                | 85.2±14.4 <sup>#,**</sup>                          | 0.015   |
| Aspartate aminotransferase, IU/L <sup>¶</sup>                    | 23.9±11.3                             | 22.4±11.3                                             | 37.3±37.9 <sup>#,**</sup>                          | <0.001  |
| Alanine aminotransferase, IU/L <sup>¶</sup>                      | 19.2±10.3                             | 22.4±7.3 <sup>#</sup>                                 | 37.3±37.9 <sup>#,**</sup>                          | <0.001  |
| Platelet count, 10 <sup>9</sup> /L <sup>¶</sup>                  | 235.8±54.8                            | 260.2±50.9                                            | 203.7±46.0 <sup>#,**</sup>                         | <0.001  |
| Gamma glutamyl-transpeptidase, IU/L <sup>¶</sup>                 | 26.9±44.0                             | 46.7±42.2 <sup>#</sup>                                | 75.5±96.0 <sup>#,**</sup>                          | <0.001  |
| <b>Liver fibrosis and steatosis</b>                              |                                       |                                                       |                                                    |         |
| NAFLD fibrosis score                                             | 1.1±1.0                               | 0.9±0.8 <sup>#</sup>                                  | 2.2±1.0 <sup>#,**</sup>                            | <0.001  |
| Fibrosis-4 index                                                 | 1.5±0.9                               | 1.0±0.7                                               | 1.9±1.2 <sup>#,**</sup>                            | <0.001  |
| Fatty liver index                                                | 13.8±10.2                             | 52.4±16.0 <sup>#</sup>                                | 58.4±18.9 <sup>#,**</sup>                          | <0.001  |

Data are presented as mean±SD or number (%).

MAFLD, metabolic dysfunction-associated fatty liver disease; FIB-4, fibrosis-4; ASCVD, atherosclerotic cardiovascular disease; NAFLD, nonalcoholic fatty liver disease.

\*Sarcopenia was defined as the lowest quintile for sex-specific sarcopenia index; <sup>†</sup>ASCVD risk score was calculated using the 10-year ASCVD risk score from the 2013 American College of Cardiology/American Heart Association guideline; <sup>‡</sup>Central obesity was defined waist circumference ≥90 cm in men, ≥80 cm in women; <sup>§</sup>Overweight was defined body mass index ≥23 kg/m<sup>2</sup>; <sup>||</sup>Heavy drink was defined as those whose alcohol consumption exceeded 140 g/week for men and 70 g/week for women; <sup>¶</sup>Log-transformed; <sup>#</sup>p<0.05 by *post hoc* analyses when compared without MAFLD; <sup>\*\*</sup>p<0.05 by *post hoc* analyses when compared with MAFLD, without significant liver fibrosis.
